# Supplementary material for: Association of Circulating Tumor DNA Fraction Analysis with Clinical and Pathologic Characteristics in Endometrial and Ovarian Cancer
Source: Preprints.org preprint supplement (doi:10.20944/preprints202311.1471.v1), 2023-11-23
Supplement: Supplementary file 1 [file supplementary]

**SUPPLEMENTARY FIGURE 1. Association of tumor fraction with patient characteristics.** The association of the tumor fraction (TFx) of the first ‘sentinel’ blood draw was evaluated relative to clinicopathologic characteristics, including: (**A**) ovarian versus endometrial cancer; (**B**)primary versus recurrent settings within each individual cancer type; (**C-D**) tumor histology within each cancer type; (**E**) tumor grade; **(F)** best overall therapy response. TFx is presented non-transformed in each y-axis. (**G**) TFx dynamics of patients with endometrial cancer. Each individual patient represented by a different color, as indicated.

| **Supplementary Table S1. Tumor fraction association with clinical and pathologic variables in endometrial and ovarian cancer** | | | | |
| --- | --- | --- | --- | --- |
| Cancer Site | Outcome | Raw P-Value | Adjusted P-Value | Test Type |
| Endometrial | Histology | 0.620 | 0.861 | Rank Sum |
| Endometrial | MSI | 0.242 | 0.861 | T-test |
| Endometrial | Grade | 0.481 | 0.861 | ANOVA |
| Endometrial | Stage | 0.622 | 0.861 | Rank Sum |
| Endometrial | Therapy Response | 0.990 | 0.990 | ANOVA |
| Endometrial | Vital Status | 0.527 | 0.861 | ANOVA |
| Endometrial | Metastasis - Peritoneal | 0.646 | 0.861 | T-test |
| Endometrial | Metastasis - Liver | 0.579 | 0.861 | T-test |
| Endometrial | Metastasis - Pleural | 0.705 | 0.861 | T-test |
| Endometrial | Metastasis - Nodal | 0.988 | 0.990 | T-test |
| Endometrial | Metastasis - Other | 0.061 | 0.667 | Rank Sum |
| Ovarian | Histology | 0.239 | 0.614 | Rank Sum |
| Ovarian | BRCA | 0.273 | 0.614 | T-test |
| Ovarian | Grade | 0.010 | 0.094 | T-test |
| Ovarian | Stage | 0.841 | 0.841 | Rank Sum |
| Ovarian | Therapy Response | 0.398 | 0.716 | ANOVA |
| Ovarian | Vital Status | 0.828 | 0.841 | ANOVA |
| Ovarian | Metastasis - Peritoneal | 0.623 | 0.801 | T-test |
| Ovarian | Metastasis - Liver | 0.481 | 0.722 | T-test |
| Ovarian | Metastasis - Pleural | 0.180 | 0.614 | T-test |
