# Supplementary figures and images for: Association of Circulating Tumor DNA Fraction Analysis with Clinical and Pathologic Characteristics in Endometrial and Ovarian Cancer
Source: Preprints.org preprint supplement (doi:10.20944/preprints202311.1471.v1), 2023-11-23

# Supplementary Figure 1

A

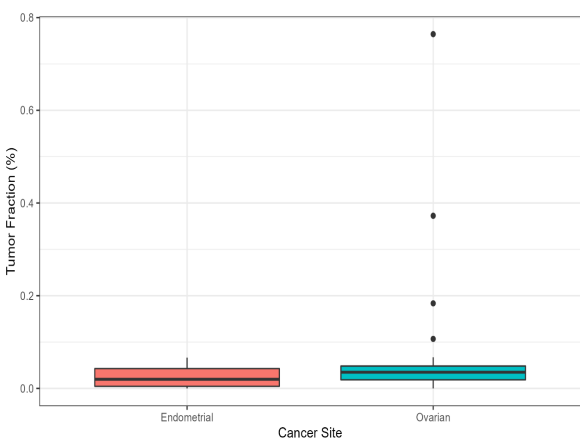

B

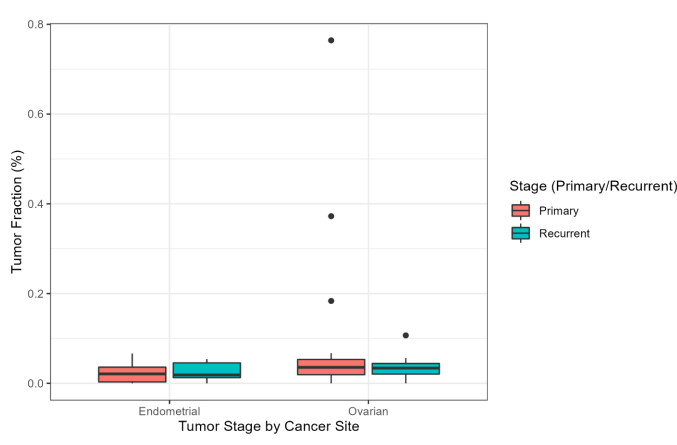

C

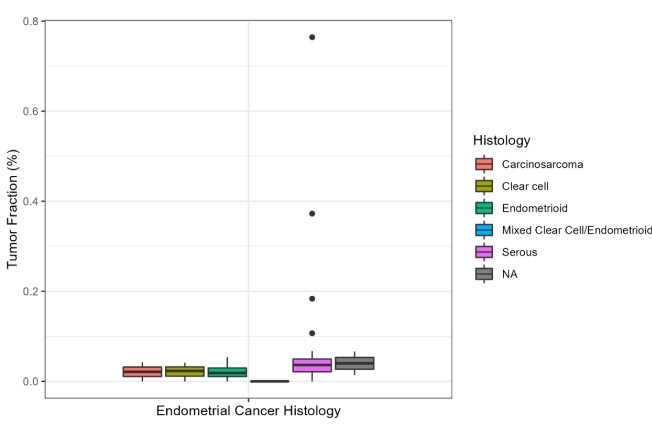

D

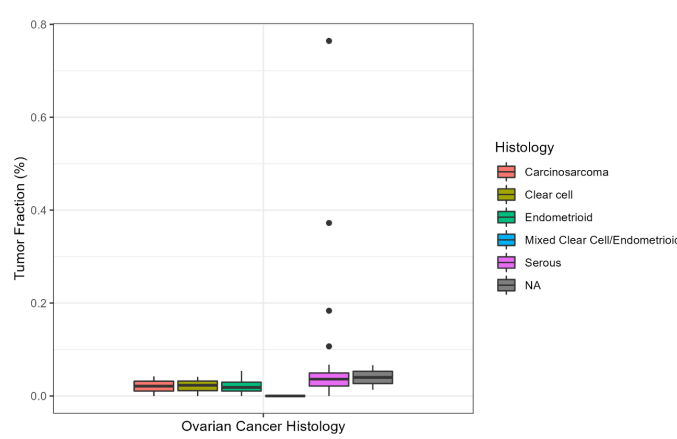

E

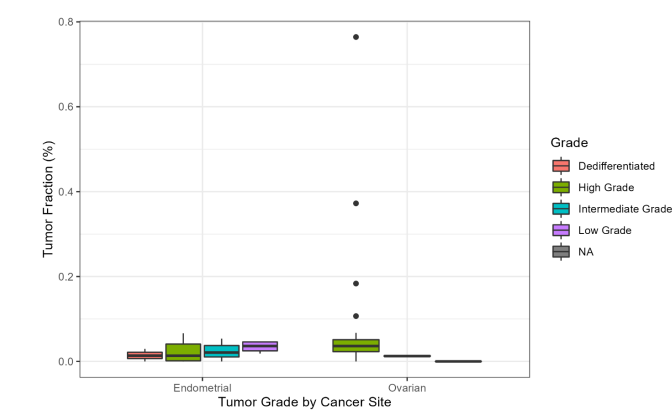

F

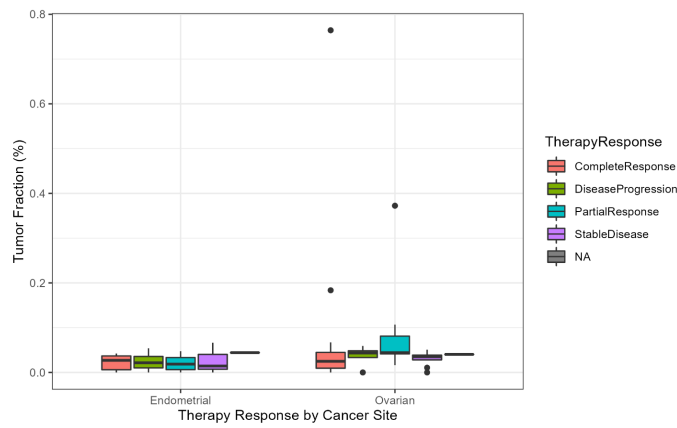

G

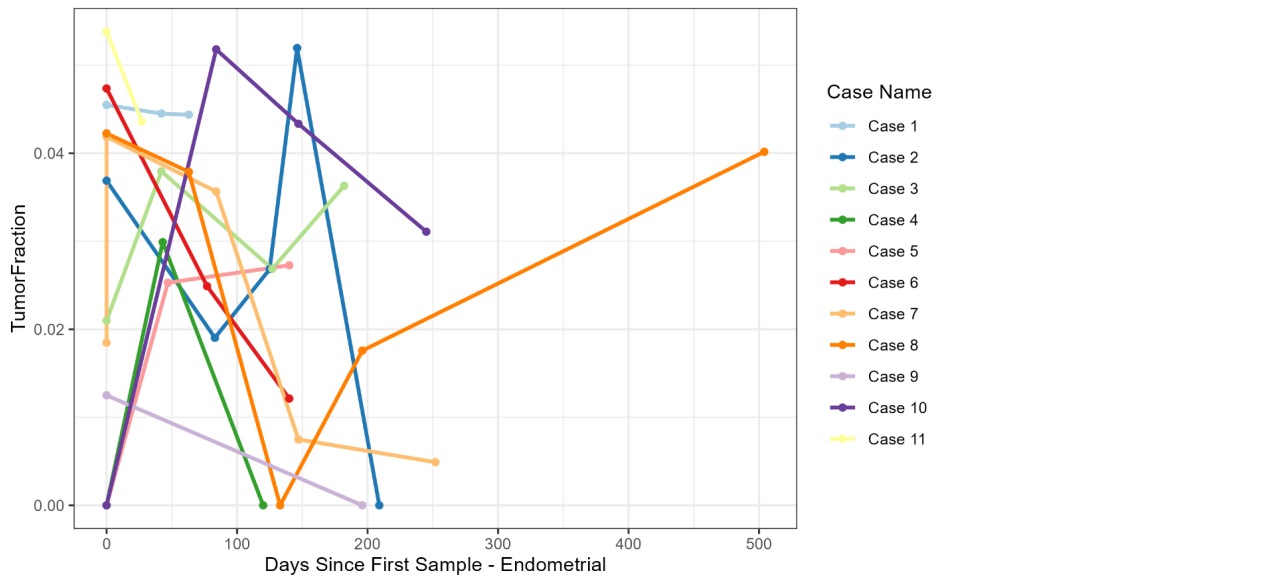

Supplement: Supplementary file 1 [file supplementary]
